DRAFT

**Lightweight bioinformatics: evaluating the utility of Single Board Computer (SBC) clusters for portable, scalable Real-Time Bioinformatics in fieldwork environments via benchmarking.**

*Dr. Joe Parker<sup>1,2</sup>*

<sup>1</sup>*The Jodrell Laboratory, Royal Botanic Gardens, Kew, TW9 3AA, England, UK*

<sup>2</sup>*Kitson Consulting Limited, Bristol, UK.*

*\*Corresponding author: [joe@kitson-consulting.co.uk](mailto:joe@kitson-consulting.co.uk)*

Keywords: bioinformatics, real-time phylogenomics, field-sequencing, benchmarking, single-board computer

## DRAFT

### Abstract

16 The versatility of the current DNA sequencing platforms and the development of  
portable, nanopore sequencers means that it has never been easier to collect genetic  
18 data for unknown sample ID. In fact, the distinction between fieldwork and the laboratory  
is becoming blurred since genome-scale data can now be collected in challenging  
20 conditions in a matter of hours. However, the full scientific and societal benefits of these  
new methods can only be realised with equally rapid and portable analyses. At present,  
22 field-based analyses of genomic data, despite advances in computing technology,  
remain problematic; laptop computers are relatively expensive and limited in scalability,  
24 while cloud- and cluster-based analyses depend, for the time being, on sufficiently  
reliable high-bandwidth data uplinks to transmit primary data for analysis.

26 Single board computers (SBCs), such as the Raspberry Pi, offer a potential  
solution to this problem: while less powerful than their laptop cousins, their very  
28 individual low cost and power consumption mean modest arrays of SBCs could be used  
for field-based preprocessing, or complete analyses or primary data. In this study we  
30 investigate the performance of one SBC, the Pi 3 Model B+, on a range of typical field-  
sequencing tasks versus laptop and cloud-based form-factors. Our data analysis  
32 pipeline has been made available as a workflow on Github for simple, scalable  
deployment for a range of uses.

34

## DRAFT

### Introduction

36 The nucleic acids present in every living organism provide not only *the* essential information  
needed for species identification to characterise biodiversity in a sample, site, or ecosystem.  
38 They can also be interpreted to reconstruct evolutionary histories hundreds of millions of years  
back into geologic time, or furnish us with detailed information about the metabolic and  
40 immunological activity of a sample of mud, blood, or water. From the discovery of the structure  
of DNA (1953) this information was hard-won, requiring laboratories with specialised equipment  
42 and staff.

This is changing, fast. Portable single molecule, real-time DNA sequencers (such as the  
44 Oxford Nanopore MinION have now become a commercial reality. Portable sequencers allow  
DNA-sequencing to happen anywhere, in real-time, with important applications that include  
46 disease surveillance and food-chain monitoring. In less than a decade, these devices have  
moved from the drawing-board to the mainstream of genomics and there is every suggestion  
48 that science is set to undergo a transformation: millions of researchers, clinicians, conservation  
professionals and citizen-scientists will have the potential to sequence and analyse genomic  
50 material anytime, anywhere (Erich, 2015). Uses so far have included epidemic monitoring in  
Guinea (Quick *et al.*, 2016), extremophile sequencing in Antarctica (Michael *et al.*, 2017),  
52 assembly of complete plant genomes on a single flowcell, in a week (Johnson *et al.*, 2017),  
species ID and phylogenomics in the field (Parker *et al.*, 2017, 2018). The real-time nature in  
54 which reads are generated, and the very long length of nanopore reads compared with  
traditional high-throughput sequencing (HTS) inserts (tens of thousands of base-pairs compared  
56 with a few hundred), plus the availability of PCR-free direct sequencing methods, also make  
multilocus metagenomics and phylogenomics possible; a potential advantage over molecular  
58 barcoding approaches, which are far slower and also subject to error arising from reticulate  
(non-tree-like) evolution which can confound identification and inference (Mallo & Posada 2016;  
60 Liu *et al.* 2017).

While bioinformaticians and experimentalists are well-versed in the seeming existence of  
62 Moore's Law as applicable to high-performance computing (HPC) clusters and its implications,  
the past decade has also seen a parallel rise in the availability and interest of single-board  
64 computers (SBCs), most notably the Raspberry Pi family. These stripped-back computing  
devices are cheap (€50 or so), tiny – typically described as 'credit-card-sized', although many

## DRAFT

66 are smaller still – and typically consume a tenth of the power needed for a laptop, much less a  
powerful desktop, fatnode or cluster. Several authors have noted the potential for small (4-20  
68 node) SBC clusters to replace on-site laptops or remote computing resources, in diverse  
applications ranging from cyberwarfare (Matthews, 2016) to teaching (Barker *et al.*, 2013; Cox *et*  
70 *al.*, 2013). The application of SBC clusters to field-sequencing is nonetheless as immature as  
the field-sequencing devices are new.

72

In the present study, we investigate the utility of SBCs for field-based bioinformatics analyses.  
74 Several analyses of previously published datasets are carried out to test the performance of the  
Raspberry Pi 3, perhaps the most common SBC available at the present time, in carrying out  
76 typical tasks. Run times are benchmarked and compared to typical values for other platforms.  
Finally, the wider context and possible future development of this field are considered.

78

## DRAFT

### Methods

80

**Equipment:** To conduct the present study we assembled a small cluster (6 nodes, plus headnode; see Figure 1a) of Raspberry Pi 3 Model B+ SBCs, and used this cluster to benchmark typical field-sequencing genomics analyses tasks in comparison to a consumer laptop (Apple MacBook Pro, 2011) and a bioinformatics fatnode / enterprise HPC machine (Dell PowerEdge). Field-analysis cluster components are listed in Table 1; specifications for comparison machines in Table 2.

88 **Data:** Source data was taken from field-sequencing studies previously reported in Parker *et al.* (2017) and Parker *et al.* (2018a); see Table 3. Briefly DNA was extracted from fresh plant tissue using commercial kits (Qiagen DNEasy Plant Miniprep) and whole genome shotgun libraries were prepared for MinION R9 and R9.5 chemistry using rapid (SQK-RAD001/RAD003) protocols and kits. Field-extraction and sequencing were carried out in Richmond Park, London, and Snowdonia National Park, Wales. A full list of equipment required for field-sequencing is given in the Supplementary Information for those papers.

96 **Operating system/pipeline:** Ubuntu 16.04.3 LTS was installed on all nodes. Having experimented with various job schedulers (Condor, Slurm) and chunking approaches, we determined that the most stable configuration was also the simplest (nodes dedicated to individual tasks, working in series from a common read pool). A watch-script was used to monitor a shared 1TB NFS drive, to which the MinION sequencing laptop also had write access to deposit newly sequenced reads in real-time. In prototype, 1000-read chunks were analysed and moved sequentially through the pipeline (shown in Figure 1b).

04 **Guppy basecaller:** The basecaller is an algorithm responsible for converting raw measurements from the sequencing machine into nucleotide sequences. We used the experimental Guppy basecaller, source provided by Oxford Nanopore Technologies. To benchmark performance a complete set of 4000 reads (N50 1.9kbp; max >50kbp) from the Parker *et al.* (2018b) acute oak decline study was analysed for five replicates, and an approximate handling time per read averaged.

## DRAFT

10

**Read mapping/matching:** BLASTN (Camacho 2008) is typically used to test all reads for the presence of host, contaminant/control (human; phage lambda) and target pathogen DNA sequences. In benchmarking, reads from the 2017 Parker *et al.* study were subsampled randomly without replacement (as in Parker *et al.*, 2018a) and matched against the *A. thaliana* reference genome (TAIR10) using BLAST with 1, 2, 3 or 4 threads and only best hits retained.

16

**ab initio gene prediction:** SNAP was used to predict the occurrence of coding genes directly from individual reads.

18

**Phylogeny inference:** Once a set of orthologous genes have been identified, they can be aligned and a phylogeny (evolutionary hypothesis) inferred. Multiple alignments comprising 6-10 taxa and 500-2000bp were created from the ten best SNAP-identified, BLAST-checked genes with Muscle and phylogenies inferred with RAxML (as in Parker *et al.*, 2017)

24

**Metagenomic classification:** Kraken (Wood, 2014) were used for metagenomic classification of MinION reads from mixed samples using *k*-mer hashing, here tested against the acute oak decline dataset.

28

## DRAFT

### Results

30

**Guppy basecaller:** 4000 .fast5 reads were basecalled using Guppy. Results are given in Table S1. To execute adequately, the options for single threading and small (1000) chunk size were required. Basecalling the whole set on a Raspberry pi required mean execution real / user time of 15,146/30,217s (s.d., 213/426s) for the set (approx 3.5s (real) / 7.6s (user) per read;  $N=5$ ). On the fatnode mean execution real / user time was 530/3194s (s.d., 33/27s) for the set (approx 0.25s (real) / 1s (user) per read;  $N=3$ ). Effectively, reads were basecalled seven times slower using a single Pi node.

38

**Read mapping/matching:** BLASTN (Camacho 2008) ran adequately on the Pi SBCs by comparison to other systems running equivalent query task sizes (Table 3; Table S2; Figure 3a). As expected, wall clock time increased approximately as  $O(n)$  with number of reads, with each platform analysed (Figure 3b).

**ab initio gene prediction, alignment, and phylogeny inference:** SNAP ran adequately on all systems and installed simply on the Pi's ARM architecture. However execution as measured by wall-clock time was approximately an order of magnitude slower than for the lab node (Figure 4a; Table S3). Similarly, muscle and RAxML both installed to the Pi easily, and in series ran well on the SBC nodes though an order of magnitude slower than the lab node (Table S4; Figure 4b). Surprisingly higher thread count did not make an appreciable difference to run times.

50

**Metagenomic classification:** Kraken metagenomic classification of reads from mixed samples did not perform well. Owing to RAM constraints, only the very smallest databases could be queried.

54

## DRAFT

### Discussion

56 *Successes: high-compute, low-memory tasks (BLASTN, Muscle, RAxML)*

Those tasks focused on CPU resource rather than memory performed well on the SBCs,  
58 even in comparison with the other systems (roughly as a function of clock speed,  
unsurprisingly).

60

*Plausible: high-compute, intermediate-memory tasks (Guppy basecaller)*

62 We found that execution of the experimental Guppy basecaller was plausible for these  
machines, but higher memory (RAM) constraints meant the low availability on these SBCs  
64 limited performance, and careful argument optimisation was needed to gain stable behaviour.  
Nonetheless, since performance on a single node was within an order of magnitude to that  
66 obtained with a lab node, it is feasible that a larger number of Pis (perhaps 4-8) could keep  
pace with real-time nanopore read generation easily.

68

*A failure: metagenomic classification via Kraken (high-memory)*

70 Kraken is usually recommended for a minimum of 8Gb RAM and unsurprisingly all but  
the smallest databases (a few taxa) could not be loaded into the limited physical RAM (1Gb)  
72 found on the Raspberry Pis.

74 *Advantages of SBC clusters*

Aside from their low cost (and so scalability), the power consumption and portability of  
76 SBC clusters compares well with other systems; a grid of 10-20 SBCs, powered from a single  
AC generator outlet or vehicle cell, would draw no more than 10A/50W (~0.5A, 5vDC each),  
78 comparable to (or less than) a single laptop, and with more computational power. A 20-node  
SBC cluster could, with careful design, disassemble into a small rucksack.

80

*Outstanding challenges*

82 The main shortcoming of these systems is their low RAM, since this precludes the  
Kraken metagenomic classifier (and genome assembly). However, we have previously argued  
84 (Parker *et al.* 2017; 2018a) that classification of extremely long, but noisy, reads using an exact  
*k*-mer approach (as in Kraken) is counterintuitive, and shown that mapping whole reads



## DRAFT

86 (BLASTN; Exonerate; LASTAL) has many underappreciated merits; in this context, the good  
performance of BLASTN on the SBC cluster is heartening. Our job scheduling/load balancing  
88 approach is also naïve and while full MPI parallelisation is unlikely to be efficient (given the  
limited node interconnect bandwidth available for these systems), further work to optimise an  
90 existing scheduler deployment (Slurm; Condor) or devise a new realtime system, perhaps  
based on Watchdog or node.js, is likely to yield quick rewards. Finally it should be borne in mind  
92 that, since these clusters' main use is envisaged for low-bandwidth sites, pushing software  
updates or expanding reference datasets in the field will remain challenging.

94

### Conclusion

96 We have shown that SBC clusters are adequate for a surprising range of useful bioinformatics  
tasks related to field-based DNA sequencing and analysis. While a single SBC's performance is  
98 inferior to a laptop (let alone an HPC/cloud resource) in every aspect except power  
consumption, the performance gap is not too great to render SBC clusters adequate to perform  
:00 analyses in cases where cost is a factor, an expensive laptop might not survive, or insufficient  
bandwidth exists for uplink to remote resources. However, high-memory tasks, including *de*  
:02 *novo* assembly, remain outside the scope of these architectures, and are likely to remain so for  
the near-future. In addition, improved load balancing / job scheduling efficiency for these  
:04 resources would greatly improve their utility.

### :06 Acknowledgements

The author thanks James Crowe at RBG Kew, Dan Barker at the University of St. Andrews,  
:08 Simon Cox at the University of Southampton and Suzanne J. Matthews at USMA for advice and  
encouragement. This work was funded by a Pilot Study Fund award to JDP from the Kew  
:10 Foundation.

:12

DRAFT

!12 **References**

!14 Barker *et al.* (2013) 4273π: Bioinformatics education on low cost ARM hardware. *BMC*  
*Bioinformatics* **14**:243

!16

Brown, B. L., Watson, M., Minot, S.S., Rivera, M.C., & Franklin, R.B. (2017). MinION™  
!18 nanopore sequencing of environmental metagenomes: a synthetic approach. *Gigascience*.  
**6**(3):1–10. doi: 10.1093/gigascience/gix007.

!20

Camacho C., Coulouris G., Avagyan V., Ma N., Papadopoulos J., Bealer K., & Madden T.L.  
!22 (2008). "BLAST+: architecture and applications." *BMC Bioinformatics* **10**:421.

!24 Coulouris, G. et al. (2008) BLAST+: architecture and applications. *BMC Bioinformatics* **10**:421.

!26 Cox, S. *et al.* (2013) Iridis-pi: a low-cost, compact demonstration cluster. *Cluster Computing* doi:  
10.1007/s10586-013-0282-7

!28

Edgar, R. C. (2004) MUSCLE: multiple sequence alignment with high accuracy and high  
!30 throughput. *Nucleic Acids Res* **32**(5):1792–97.

!32 Erlich, Y. (2015) A vision for ubiquitous sequencing. *Genome Res.* **25**:1411–1416.

!34 Juul, S., Izquierdo, F., Hurst, A., Dai, X., Wright, A., Kulesha, E., Pettett, R., & Turner, D.J.  
(2015) What's in my pot? Real-time species identification on the MinION *biorxiv* doi:  
!36 <https://doi.org/10.1101/030742>.

!38 Johnson, S.S., et al. (2017). Real-time sequencing in the Antarctic dry valleys using the Oxford  
Nanopore Sequencer. *J. Biomolec. Tech.* **28**(1):1-6

!40

Korf, I. (2004) Gene finding in novel Genomes. *BMC Bioinformatics* **5**:59.

!42

DRAFT

- !44 Liu, J., Jiang, J., Song, S., Tornabene, L., Chabarria, R., Naylor, G.J.P., et al. (2017). Multilocus  
DNA barcoding - Species identification with multilocus data. *Sci. Rep.* **7**: 1–12.
- !46 Mallo, D. & Posada, D. (2016). Multilocus inference of species trees and DNA barcoding. *Phil.  
Trans. R. Soc. London B* **371**:20150335.
- !48  
Suzanne J. Matthews, Raymond W. Blaine, and Aaron F. Brantly (2016) Evaluating Single  
!50 Board Computer Clusters for Cyber Operations. *2016 INTERNATIONAL CONFERENCE ON  
CYBER CONFLICT (CYCONUS)*
- !52  
Michael, T.P., et al. (2017). High contiguity *Arabidopsis thaliana* genome assembly with a single  
!54 nanopore flowcell. *bioRxiv* doi: 10.1101/149997
- !56 Parker, J., Coker, T., Devey, D., Papadopoulos, A.S.T., & Buggs, R.J.A. (2018b in prep.) Field-  
based, real-time metagenomics and phylogenomics for responsive pathogen detection: lessons  
!58 from nanopore analyses of Acute Oak Decline (AOD) sites in the UK. *Preprint*.
- !60 Parker, J., Helmstetter, A., & Papadopoulos, A.S.T. (2018a) Rapid, raw-read reference and  
identification (R4IDs): A flexible platform for rapid generic species ID using long-read  
!62 sequencing technology. *bioRxiv*: doi: 10.1101/281048
- !64 Parker, J., Helmstetter, A.J., Devey, Di., Wilkinson, T. & Papadopoulos, A.S.T. (2017). Field-  
based species identification of closely-related plants using real-time nanopore sequencing. *Sci.*  
!66 *Rep.* **7**: 1–8.
- !68 Parra, G., Bradnam, K. & Korf, I. (2007) CEGMA: a pipeline to accurately annotate core genes  
in eukaryotic genomes. *Bioinformatics* **23**(9):1061–1067
- !70  
Quick, J., et al. (2016). Real-time, portable genome sequencing for Ebola surveillance. *Nature*  
!72 **530**:228-232.

DRAFT

:74 Sipos, G. *et al.* (2017) Genome expansion and lineage-specific genetic innovations in the forest  
pathogenic fungi *Armillaria*. *Nat. Ecol. Evol.* doi:10.1038/s41559-017-0347-8

:76  
Stamatakis, A. (2014) RAxML version 8: a tool for phylogenetic analysis and post-analysis of  
:78 large phylogenies. *Bioinformatics* **30**(9):1312–1313.

:80 Wood, D. E. & Salzberg, S. L. (2014). Kraken: Ultrafast metagenomic sequence classification  
using exact alignments. *Genome Biology* **15**:R46.

:82

DRAFT

## Figures and tables

A

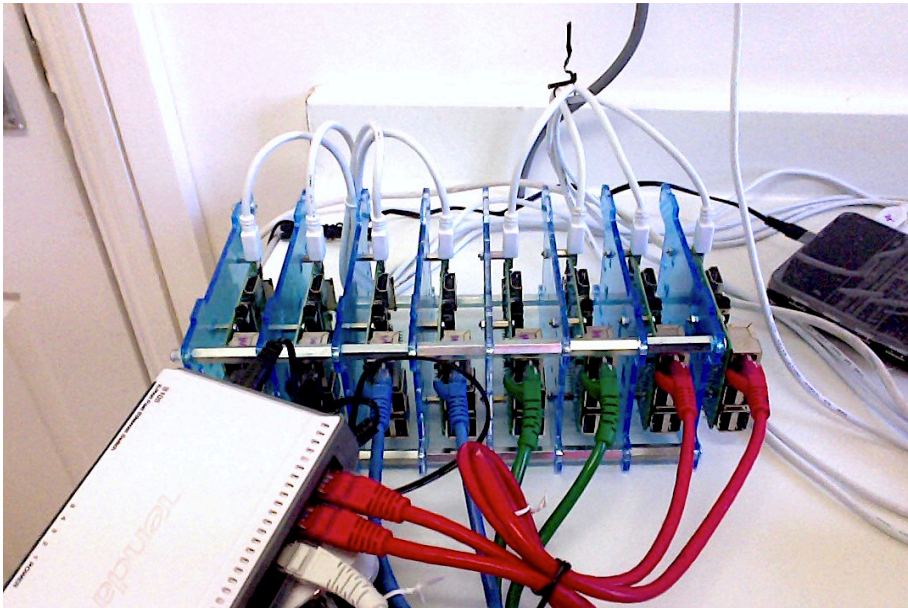

B

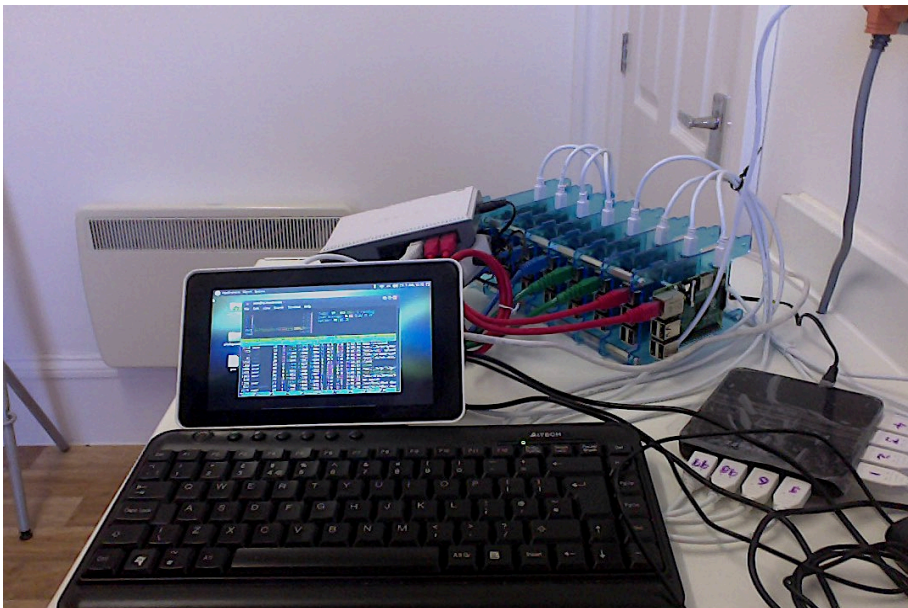

:84

### Figure 1a:

:86 Picture of bioinformatics cluster for field-sequencing comprising 8 Raspberry Pi SBCs plus headnode. *A*,  
:88 detail of worker nodes, enclosure and cabling; *B*, overview of the whole cluster, including headnode  
with IO peripherals. The cluster (excluding power) fits into a standard daysack.

:90

DRAFT

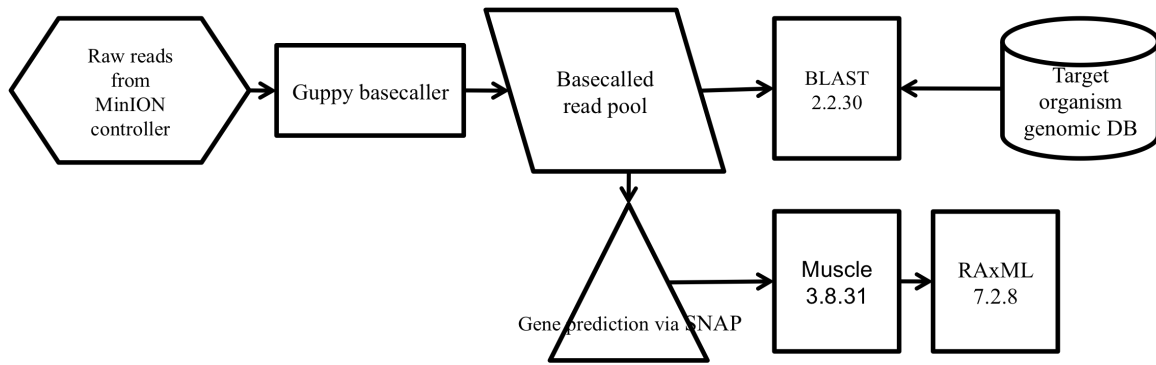

:90

:92

**Figure 2b:**

:94

Block diagram of principal workflow units. Reads are passed from the MinION controller (laptop running MinKNOW client) to the common read pool (shared NFS drive on SBC cluster). Individual nodes are assigned discrete tasks in the pipeline (delimited by subdirectory structure) with responsibility for monitoring upstream progress and passing completed outputs to the next node.,

:96

:98

DRAFT

98

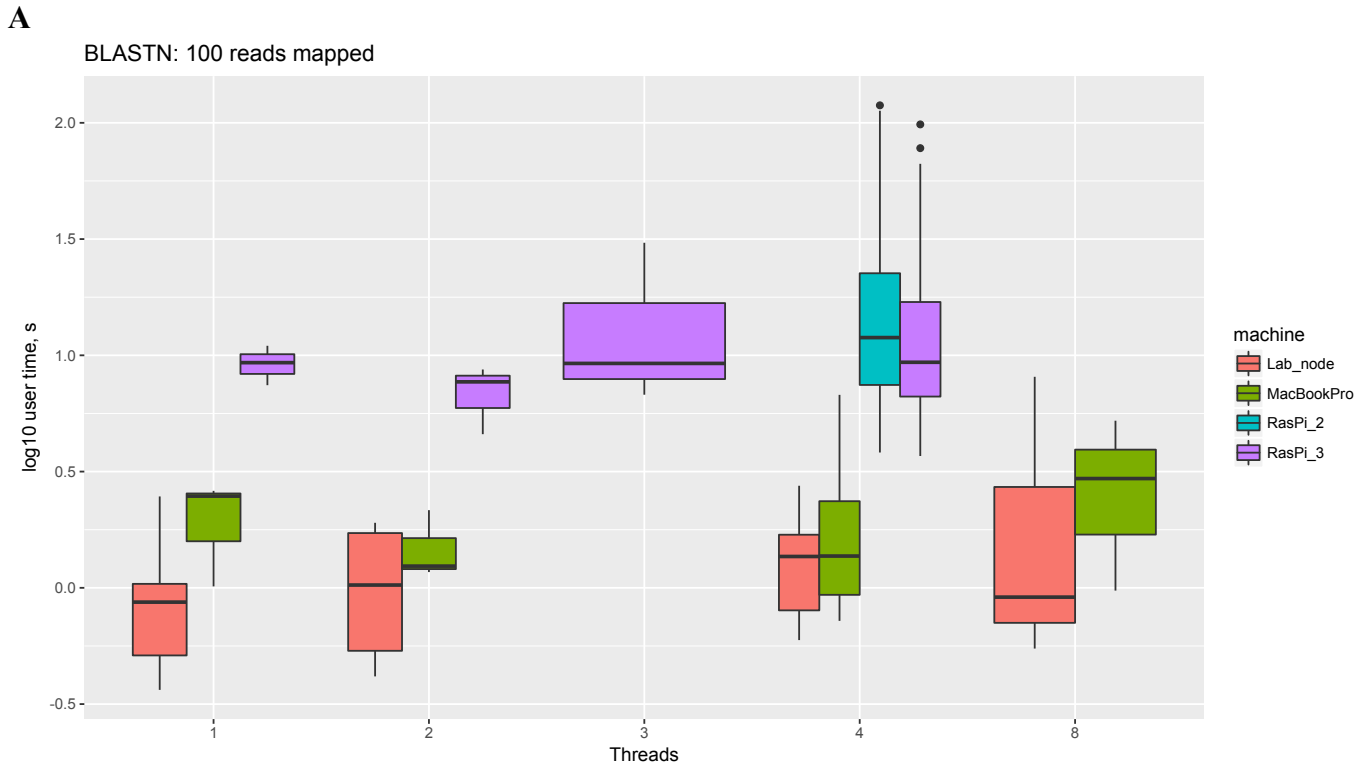

100

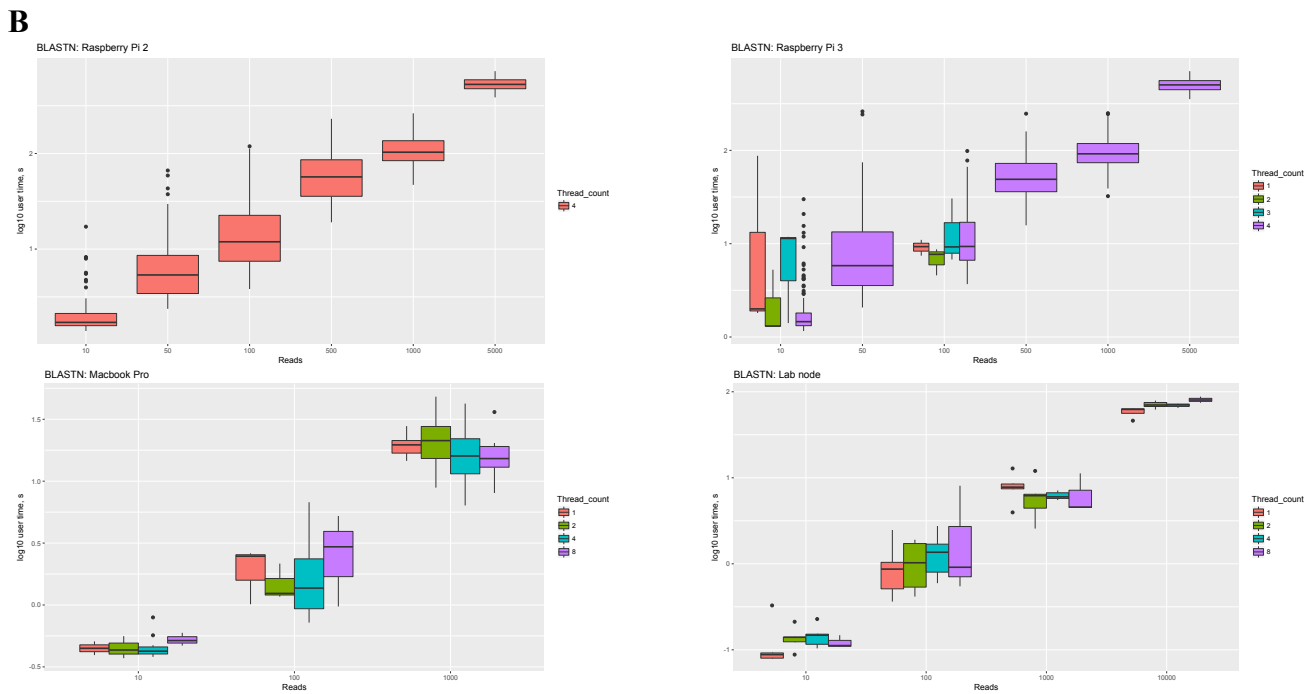

Table 1

102

**Figure 3:**

104

Performance of single cluster node on sample classification using BLASTN. A, log<sub>10</sub> user time (seconds) to map 100 reads, mean of 30 replicates. B, performance of (clockwise from top-left): Raspberry Pi 2; Raspberry Pi 3; Lab node; Macbook Pro.

106

DRAFT

06

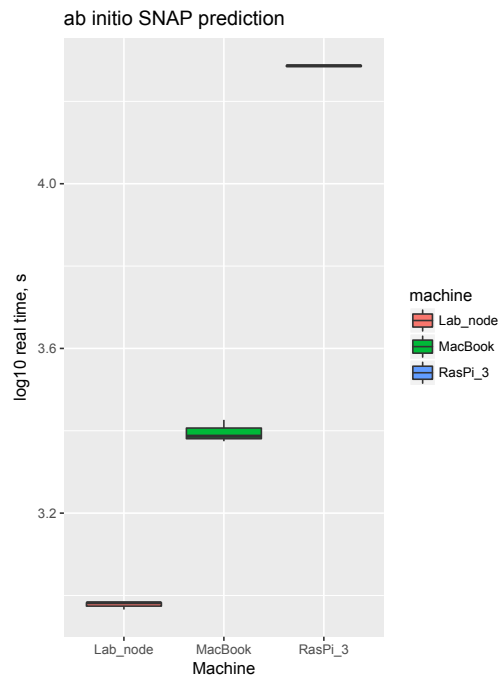

08

**Figure 4a:**

10

Performance of single cluster node on direct raw-read annotation using SNAP. 96,000 Nanopore reads were annotated using SNAP ( $N=5$ ).

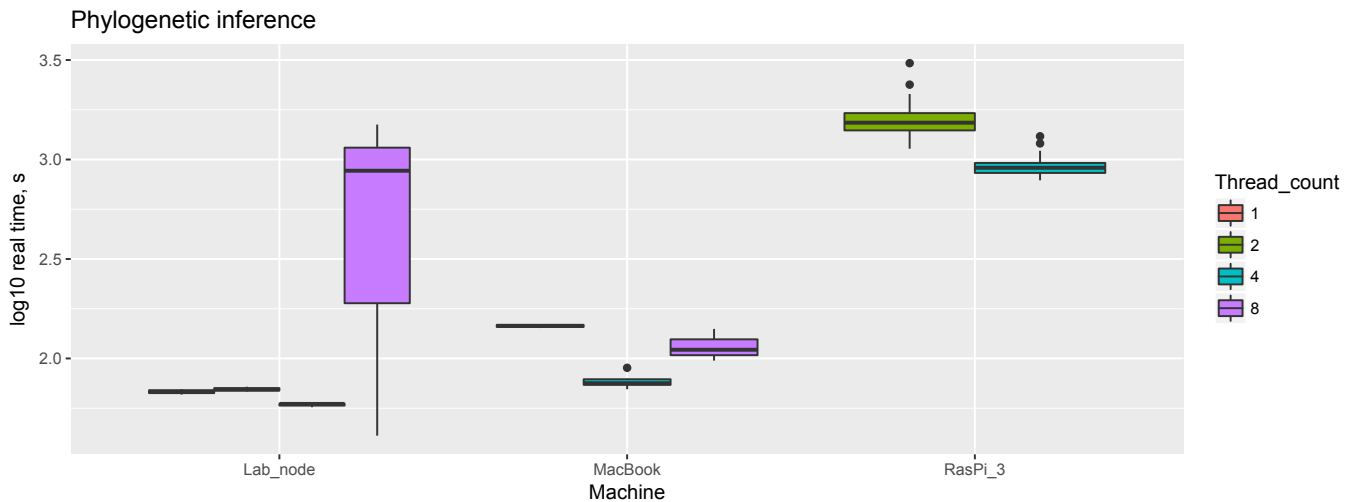

12

**Figure 4b:**

14

Performance of single cluster node on phylogeny inference using Muscle and RAxML. A dataset of 10 coding genes was aligned and a phylogeny inferred with varying numbers of threads ( $N=5$ )

16



DRAFT

| Component                        | Qty | Cost each (£GBP) | Subtotal | Link                                                                                                                                                                                        |
|----------------------------------|-----|------------------|----------|---------------------------------------------------------------------------------------------------------------------------------------------------------------------------------------------|
| Raspberry Pi 3 Model B+          | 7   | £29.99           | £209.93  | <a href="https://uk.rs-online.com/web/p/processor-microcontroller-development-kits/8968660/">https://uk.rs-online.com/web/p/processor-microcontroller-development-kits/8968660/</a>         |
| USB-micro power cables           | 7   | £-               | £-       |                                                                                                                                                                                             |
| 60cm ethernet cables, cat 5e     | 7   | £0.77            | £5.39    | <a href="https://uk.rs-online.com/web/p/cat5e-cable-assemblies/0556538/">https://uk.rs-online.com/web/p/cat5e-cable-assemblies/0556538/</a>                                                 |
| Touchscreen display for headnode | 1   | £50.39           | £50.39   | <a href="https://uk.rs-online.com/web/p/graphics-display-development-kits/8997466/">https://uk.rs-online.com/web/p/graphics-display-development-kits/8997466/</a>                           |
| Touchscreen enclosure            | 1   | £14.99           | £14.99   | <a href="https://uk.rs-online.com/web/p/development-board-enclosures/1003894/?origin=PSF_502004">https://uk.rs-online.com/web/p/development-board-enclosures/1003894/?origin=PSF_502004</a> |
| Rack enclosure for nodes         | 4   | £12.95           | £51.80   | <a href="https://uk.rs-online.com/web/p/development-board-enclosures/1270213/">https://uk.rs-online.com/web/p/development-board-enclosures/1270213/</a>                                     |
| Ethernet switch                  | 1   | £20.55           | £20.55   | <a href="https://uk.rs-online.com/web/p/network-hubs-switches/1363019/">https://uk.rs-online.com/web/p/network-hubs-switches/1363019/</a>                                                   |
| USB power hub                    | 1   | £36.44           | £36.44   | <a href="https://uk.rs-online.com/web/p/usb-hubs/7067117/">https://uk.rs-online.com/web/p/usb-hubs/7067117/</a>                                                                             |
| 32Gb microSD                     | 7   | £15.92           | £111.44  | <a href="https://uk.rs-online.com/web/p/secure-digital-cards/7603615/">https://uk.rs-online.com/web/p/secure-digital-cards/7603615/</a>                                                     |
| <i>Totals:</i>                   |     | <u>£389.49</u>   |          |                                                                                                                                                                                             |

i18

**Table 1:**

i20

Component list for Raspi field-sequencing cluster

| System               | Architecture | CPU type, clock GHz | Number of cores | RAM Gb | Scratch size, Gb |
|----------------------|--------------|---------------------|-----------------|--------|------------------|
| Lab node (PowerEdge) | i686         | Xeon E5620, 2.4     | 8               | 64     | 1000, SSD        |
| Raspberry Pi 2 B+    | ARM          | ARMv7, 1.0          | 1               | 1      | 8, microSD       |
| Raspberry Pi 3 B+    | ARM          | ARMv7, 1.2          | 1               | 1      | 32 microSD       |
| Macbook Pro (2011)   | x64          | Core i7, 2.2        | 4               | 8      | 250, SSD         |
| (EC2 m4.10xlarge)    | x64          | Xeon E5, 2.4        | 40              | 160    | 320, SSD         |

i22

**Table 2:**

i24

Comparison of systems evaluated in this study.

i26

DRAFT

26

| Machine        | Number of threads | Number of queries | Mean wall clock time (s) | Std. dev |
|----------------|-------------------|-------------------|--------------------------|----------|
| Lab node       | 1                 | 10                | <b>0.17</b>              | 0.11     |
|                |                   | 100               | <b>1.12</b>              | 0.84     |
|                |                   | 1000              | <b>8.18</b>              | 3.18     |
|                |                   | 10000             | <b>58.67</b>             | 7.53     |
|                | 2                 | 10                | <b>0.14</b>              | 0.03     |
|                |                   | 100               | <b>0.75</b>              | 0.38     |
|                |                   | 1000              | <b>3.98</b>              | 2.04     |
|                |                   | 10000             | <b>41.70</b>             | 3.53     |
|                | 4                 | 10                | <b>0.11</b>              | 0.02     |
|                |                   | 100               | <b>0.71</b>              | 0.41     |
|                |                   | 1000              | <b>2.96</b>              | 0.39     |
|                |                   | 10000             | <b>31.38</b>             | 1.40     |
|                | 8                 | 10                | <b>0.09</b>              | 0.00     |
|                |                   | 100               | <b>1.43</b>              | 1.91     |
|                |                   | 1000              | <b>2.93</b>              | 1.67     |
|                |                   | 10000             | <b>34.10</b>             | 2.64     |
| MacBook Pro    | 1                 | 10                | <b>0.53</b>              | 0.07     |
|                |                   | 100               | <b>2.23</b>              | 0.93     |
|                |                   | 1000              | <b>20.43</b>             | 4.66     |
|                | 2                 | 10                | <b>0.48</b>              | 0.09     |
|                |                   | 100               | <b>1.56</b>              | 0.57     |
|                |                   | 1000              | <b>23.45</b>             | 13.69    |
|                | 4                 | 10                | <b>0.44</b>              | 0.12     |
|                |                   | 100               | <b>1.87</b>              | 1.43     |
|                |                   | 1000              | <b>17.09</b>             | 8.48     |
|                | 8                 | 10                | <b>0.59</b>              | 0.21     |
| 100            |                   | <b>2.87</b>       | 2.11                     |          |
|                |                   | 1000              | <b>16.73</b>             | 9.89     |
| Raspberry Pi 2 | 4                 | 10                | <b>3.04</b>              | 1.09     |
|                |                   | 50                | <b>6.77</b>              | 5.08     |
|                |                   | 100               | <b>11.79</b>             | 9.23     |
|                |                   | 500               | <b>33.68</b>             | 17.65    |
|                |                   | 1000              | <b>56.52</b>             | 20.25    |
|                |                   | 5000              | <b>262.25</b>            | 40.06    |
| Raspberry Pi 3 | 1                 | 10                | <b>37.62</b>             | 49.64    |
|                |                   | 100               | <b>18.86</b>             | 1.96     |
|                | 2                 | 10                | <b>9.06</b>              | 1.67     |
|                |                   | 100               | <b>14.47</b>             | 2.13     |
|                | 3                 | 10                | <b>11.37</b>             | 2.96     |
|                |                   | 100               | <b>19.32</b>             | 9.87     |
|                | 4                 | 10                | <b>3.16</b>              | 2.16     |
|                |                   | 50                | <b>9.08</b>              | 15.92    |
|                |                   | 100               | <b>10.12</b>             | 6.92     |
|                |                   | 500               | <b>31.39</b>             | 17.73    |
| 1000           |                   | <b>49.17</b>      | 19.47                    |          |
| 5000           |                   | <b>241.11</b>     | 40.32                    |          |

**Table 3:**

28 Summary BLASTN results. Reads from the *A. thaliana* dataset were subsampled without replacement and matched to the TAIR10 genome database with BLASTN.
